# Supplementary material for: Molecular Methods for the Simultaneous Detection of Tomato Fruit Blotch Virus and Identification of Tomato Russet Mite, a New Potential Virus–Vector System Threatening Solanaceous Crops Worldwide
Source: MDPI journal article supplement (doi:10.3390/v16050806), 2024-05-18
Supplement: s1 [file s1]

## Supplementary Materials

**Table S1** – List of the samples used for assessed analytical specificity as inclusivity and exclusivity. For each a result positive (+) or negative (–) was reported. For the duplex assay the target or targets that reacted were reported in the brackets. NT – not tested.

|                     |                           | <i>Real-time RT-PCR</i> |     |                   | <i>ddRT-PCR</i> |     |
|---------------------|---------------------------|-------------------------|-----|-------------------|-----------------|-----|
|                     | sample ID                 | ToFBV                   | TRM | duplex            | ToFBV           | TRM |
| inclusivity results | 92                        | +                       | -   | + (ToFBV)         | +               | -   |
|                     | 94                        | +                       | -   | + (ToFBV)         | +               | -   |
|                     | 95                        | +                       | -   | + (ToFBV)         | +               | -   |
|                     | 96                        | +                       | -   | + (ToFBV)         | +               | -   |
|                     | 97                        | +                       | -   | + (ToFBV)         | +               | -   |
|                     | 98                        | +                       | -   | + (ToFBV)         | +               | -   |
|                     | 99                        | +                       | -   | + (ToFBV)         | +               | -   |
|                     | 1                         | +                       | +   | + (ToFBV) + (TRM) | +               | +   |
|                     | 2                         | +                       | +   | + (ToFBV) + (TRM) | +               | +   |
|                     | 4                         | +                       | +   | + (ToFBV) + (TRM) | +               | +   |
|                     | 5                         | +                       | +   | + (ToFBV) + (TRM) | +               | +   |
|                     | 104                       | +                       | -   | + (ToFBV)         | +               | -   |
|                     | 1B                        | +                       | +   | + (ToFBV) + (TRM) | +               | +   |
|                     | 1C                        | +                       | +   | + (ToFBV) + (TRM) | +               | +   |
|                     | TRM b from sample 1B      | +                       | +   | + (ToFBV) + (TRM) | +               | +   |
|                     | TRM b from sample 1C      | +                       | +   | + (ToFBV) + (TRM) | +               | +   |
|                     | TRM from <i>S. nigrum</i> | +                       | +   | + (ToFBV) + (TRM) | +               | +   |
|                     | TRM from <i>S. nigrum</i> | +                       | +   | + (ToFBV) + (TRM) | +               | +   |
| exclusivity results | <i>S. lycopersicum</i>    | -                       | NT  | -                 | -               | NT  |
|                     | <i>S. nigrum</i>          | -                       | NT  | -                 | -               | NT  |
|                     | <i>C. arvensis</i>        | -                       | NT  | -                 | -               | NT  |
|                     | CEVd                      | -                       | NT  | -                 | -               | NT  |
|                     | CLVd                      | -                       | NT  | -                 | -               | NT  |
|                     | CMV                       | -                       | NT  | -                 | -               | NT  |
|                     | INSV                      | -                       | NT  | -                 | -               | NT  |
|                     | PCFVd                     | -                       | NT  | -                 | -               | NT  |
|                     | PePMV                     | -                       | NT  | -                 | -               | NT  |
|                     | PmoV                      | -                       | NT  | -                 | -               | NT  |
|                     | PSTVd                     | -                       | NT  | -                 | -               | NT  |
|                     | PVY                       | -                       | NT  | -                 | -               | NT  |
|                     | TASVd                     | -                       | NT  | -                 | -               | NT  |
|                     | TCDVd                     | -                       | NT  | -                 | -               | NT  |
|                     | TICV                      | -                       | NT  | -                 | -               | NT  |
|                     | TMV                       | -                       | NT  | -                 | -               | NT  |
|                     | ToBRFV                    | -                       | NT  | -                 | -               | NT  |
|                     | ToCV                      | -                       | NT  | -                 | -               | NT  |
|                     | ToLCNDV                   | -                       | NT  | -                 | -               | NT  |
|                     | ToMMV                     | -                       | NT  | -                 | -               | NT  |
|                     | ToMV                      | -                       | NT  | -                 | -               | NT  |
|                     | TPMVd                     | -                       | NT  | -                 | -               | NT  |
|                     | <i>A. tosichella</i>      | NT                      | -   | -                 | NT              | -   |
|                     | <i>P. adalium</i>         | NT                      | -   | -                 | NT              | -   |
|                     | <i>B. tabaci</i>          | NT                      | -   | -                 | NT              | -   |
